# Supplementary material for: Respiratory Problems And Quality Of Life Among Individuals Living İn Containers Following The 2023 Kahramanmaraş Earthquake
Source: Research Square preprint supplement (doi:10.21203/rs.3.rs-8315853/v1), 2026-02-09
Supplement: Supplementary file 1 [file 94963a320905663ec968e2be.docx]

**Inonu University Faculty of Health Sciences
Department of Physical Therapy and Rehabilitation**

**Supplementary File 1. Study-Specific Case Evaluation Form (English Version)**

**1. Full Name:……………………………………**

**2. Address:……………………………………**

**3. Telephone: Mobile: …………………………  Home: …………………………**

**4. E-mail Address:……………………………………**

**5. Sex: ☐ Male  ☐ Female**

**6. Height / Body Weight: ……………… / ………………**

**7. Date of Birth: ………………………………**

**8. Educational Status: ☐ Literate ☐ Primary School ☐ High School ☐ University**

**9. Marital Status: ☐ Single  ☐ Married  ☐ Widowed**

**10. Do you have children? ☐ Yes (Number: ……)  ☐ No**

**11. Employment Status: ☐ Employed  ☐ Unemployed**

**12. Occupation: ……………………………………**

**13. Social Security Coverage:☐ Yes  ☐ No If yes, please specify:………**

**14. Do you smoke? ☐ Yes  ☐ No**

**15. Do you consume alcohol? ☐ Yes  ☐ No**

**16. Medications Currently Used: ……………………………………………………………………**

**17. Do you experience shortness of breath? (mMRC Scale) 0 ☐ 1 ☐ 2 ☐ 3 ☐ 4 ☐**

**18. Do you have fatigue complaints? (Borg Fatigue Scale)**

**0 ☐ 1 ☐ 2 ☐ 3 ☐ 4 ☐ 5 ☐ 6 ☐ 7 ☐ 8 ☐ 9 ☐ 10 ☐**

**19. Do you have any pain or disease-related complaints? ☐ No ☐ Yes
If yes, please specify: Frequency: …………………  Duration: …………………**

**20. Do you use any assistive devices in daily living activities? ☐ No ☐ Yes
If yes, please specify the device used: …………………………**

**21. Do you have any disease-related symptoms affecting your quality of life?**

**☐ No ☐ Yes**

**If yes, please indicate:
☐ Fatigue ☐ Bladder problems ☐ Bowel problems ☐ Pain
☐ Respiratory problems ☐ Swallowing difficulty ☐ Other: ………………**

**22. Are you participating in a Physical Therapy and Rehabilitation program?**

**☐ No ☐ Yes
Duration of physical therapy: …………………**

**23. Do you have a chronic psychological disorder?**

**☐ Yes  ☐ No**

**24. Have you experienced any allergic reactions recently?**

**☐ Yes  ☐ No**

**25. Handgrip Muscle Strength: ………………………………**

**26. Pulmonary Function Test (PFT) Values:**

**FEV₁: …………………
FVC: …………………
FEV₁/FVC: …………………**
